# Supplementary material
Source: PubMed Central journal article supplement (PMC6293990)

## **Supplementary Information**

### **Supplementary Figure Legends:**

#### **Supplementary Figure S1. Tsp-1 overexpression does not increase macrophage recruitment or infiltration**

Immunohistochemical analysis of macrophage recruitment and infiltration as visualized by staining with Mac-3 antibody.

Supplementary Figure S1.

High Ras

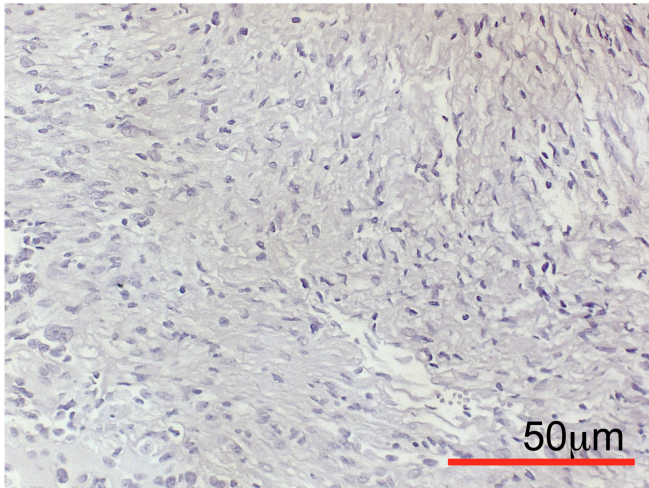

High Ras + Tsp-1

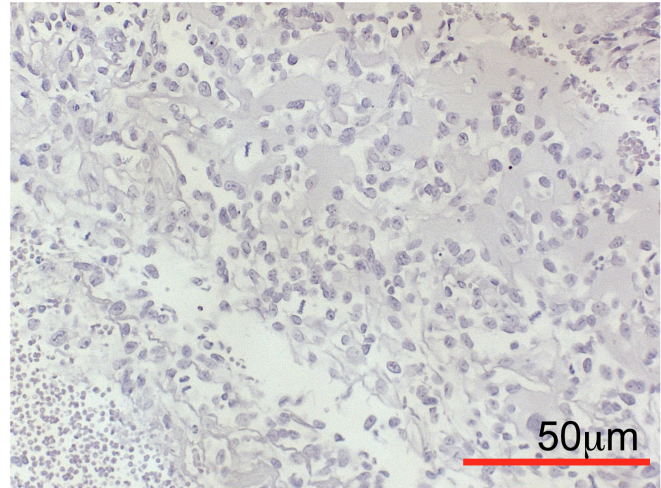

Supplement: NIHMS993921-supplement-Supplement.pdf [file NIHMS993921-supplement-Supplement.pdf]
